# Supplementary material
Source: PubMed Central journal article supplement (PMC156332)

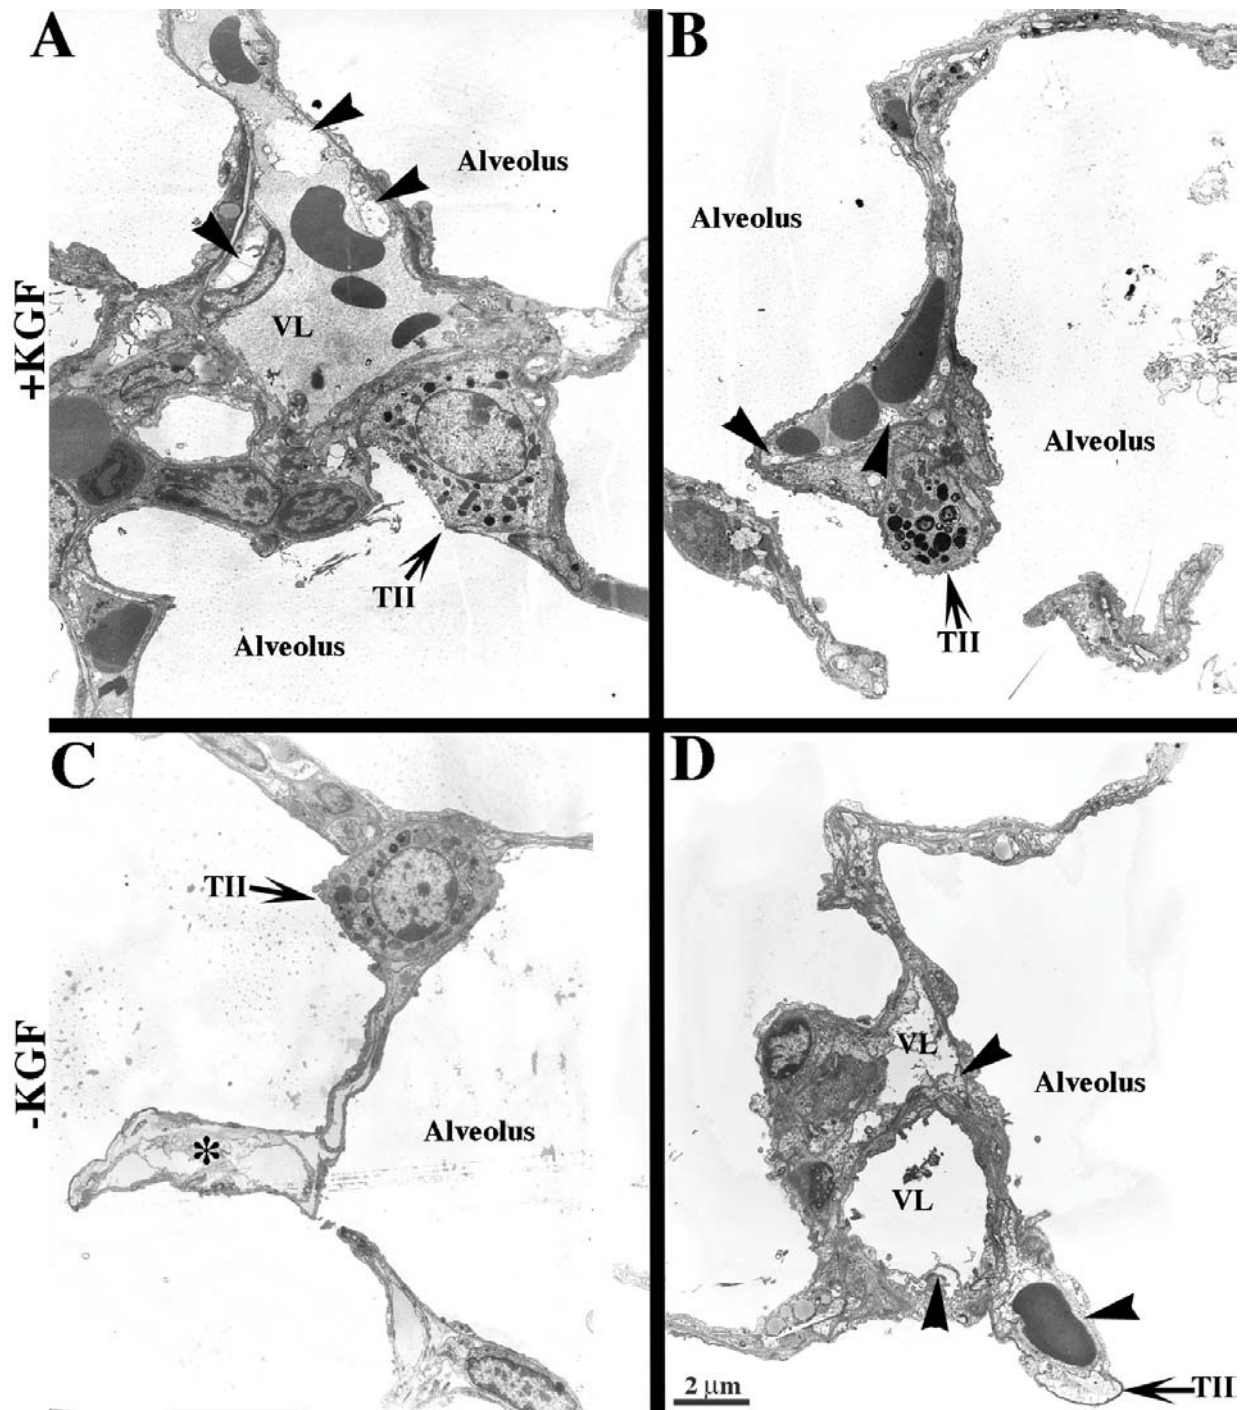

Supplement: pnas_1031851100_4.pdf [file pnas_1031851100_4.pdf]

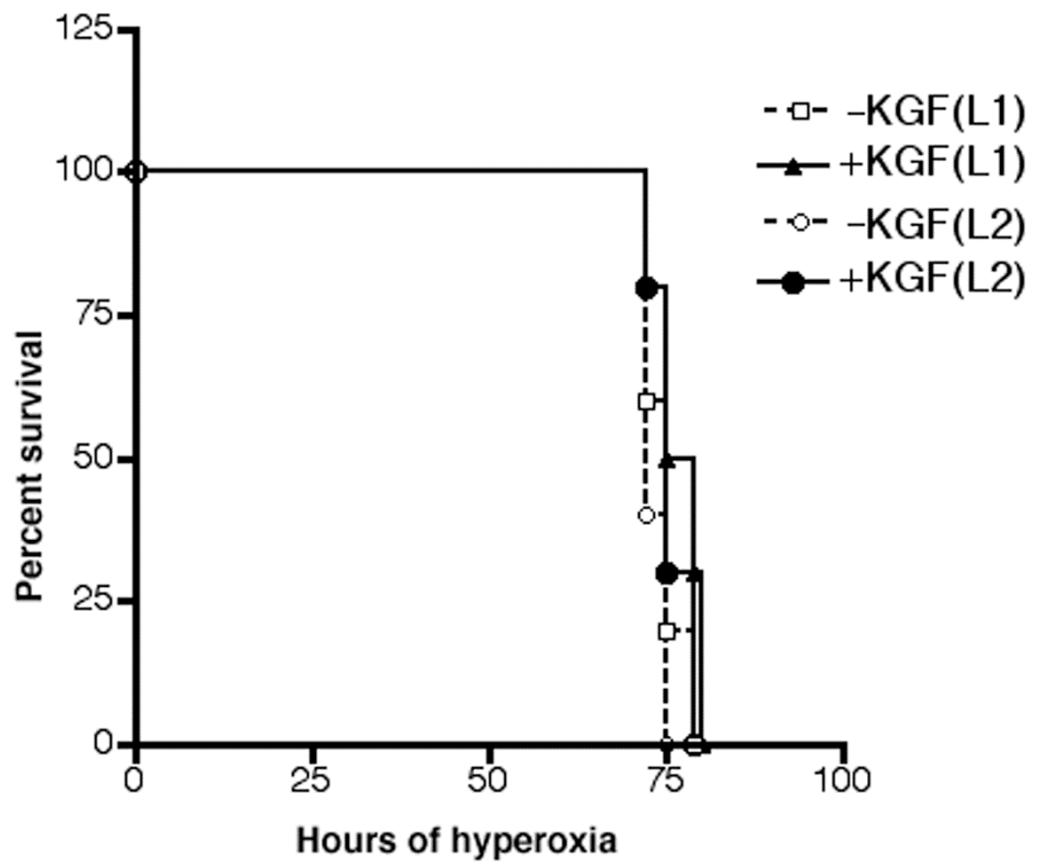

Supplement: pnas_1031851100_6.pdf [file pnas_1031851100_6.pdf]

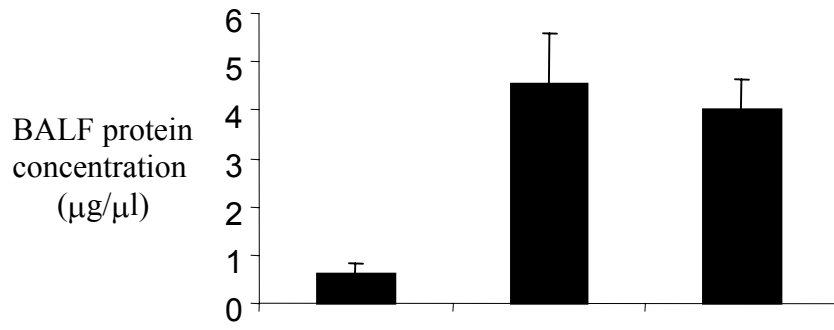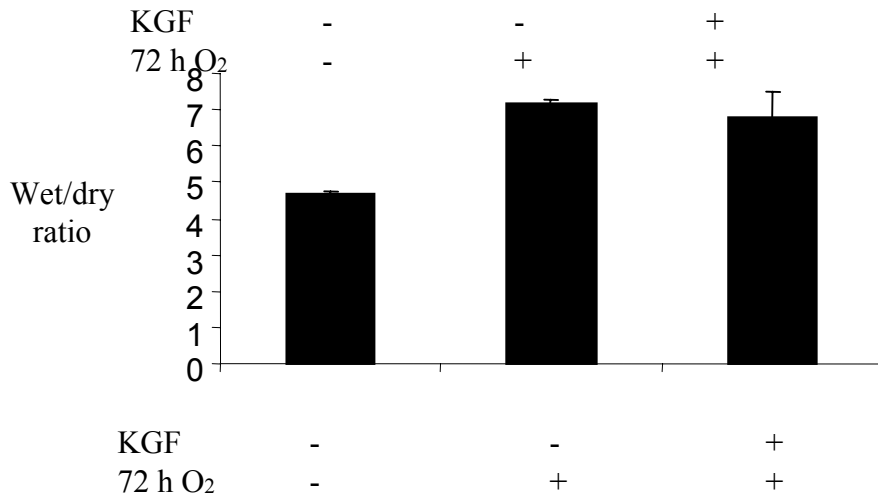

Supplement: pnas_1031851100_8.pdf [file pnas_1031851100_8.pdf]
